# Supplementary material
Source: publisher site journal article supplement (https://www.dovepress.com/article/398796)
Supplement: Supplementary file 1 [file get_supplementary_file.php]

## Supplementary file

### Supplementary Figure 1

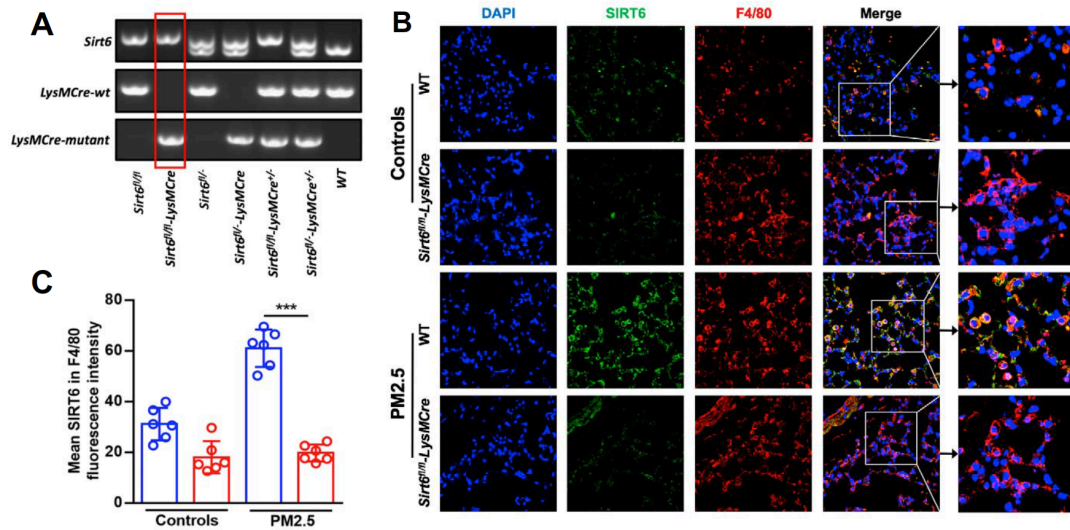

**Supplementary Figure 1. The generation of *Sirt6*<sup>fl/fl</sup>-*LysMCre* mice.** Genotyping was performed by PCR using mouse tail genomic DNA (A). Representative immunofluorescence images of SIRT6 expression in alveolar macrophages were revealed using F4/80 in lung tissues of mice ( $\times 200$ ) (B); Semiquantification of immunofluorescence images was done using Image Pro 6.1 software (C). Data are presented as Mean  $\pm$  SEM of three independent experiments (n=6 for each group).

\*\*\**P*<0.001.
